# Supplementary material for: Feeding black soldier fly larvae using wastewater treatment sludge: A zero-waste sustainable solution
Source: Research Square preprint supplement (doi:10.21203/rs.3.rs-7564807/v1), 2025-09-25
Supplement: Supplementary file 1 [file 1714045556d4d6337e9d2d45.docx]

**Table 1.** Treatment sludge solids contents

| Sludge |  | Total solid (mg/l) | Volatile solid (mg/l) | Inorganic solid (mg/l) |
| --- | --- | --- | --- | --- |
| Egg-washing wastewater treatment sludge | Mean | 15.73 | 13.26 | 2.47 |
| Stdv. | 0.41 | 0.52 | 0.19 |
| Egg-washing wastewater electrocoagulation-Al | Mean | 21.13 | 8.07 | 13.06 |
| Stdv. | 0.29 | 0.28 | 0.49 |
| Egg-washing wastewater electrocoagulation-Fe | Mean | 25.88 | 13.15 | 12.73 |
| Stdv. | 1.11 | 1.52 | 0.43 |
| Duck-slaughtering wastewater treatment sludge | Mean | 15.62 | 16.00 | 7.18 |
| Stdv. | 0.41 | 0.19 | 0.18 |
| Duck-slaughtering wastewater electrocoagulation treatment Al | Mean | 23.14 | 0.50 | 12.21 |
| Stdv. | 0.11 | 0.10 | 8.63 |
| Duck-slaughtering wastewater electrocoagulation treatment Fe | Mean | 32.01 | 12.86 | 18.04 |
| Stdv. | 0.67 | 4.76 | 6.23 |

**Table 2.** Statistical output of the effects of different sludge preparations, in comparison to a water control, on the average amount of weight gain (g) per pupae throughout the 15-day observation period. The second response variable we examined was the proportion of individuals that completed their development maturation to prepupa, at which time the insect stops feeding.

| Response Variable | DF | SS | F ratio | Prob > F |
| --- | --- | --- | --- | --- |
| Weight gain | 6,69 | 304.56 | 5.55 | 0.0001 |
| Maturation to prepupa | 6,69 | 0.163 | 6.38 | < .0001 |
